# Supplementary material
Source: PubMed Central journal article supplement (PMC2265185)

**A**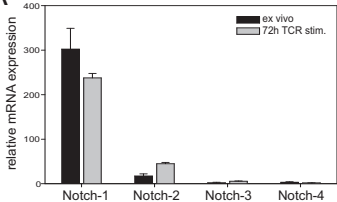**B**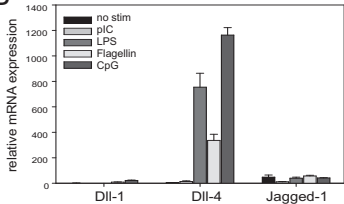

Supplement: pnas_0712102105_1.pdf [file pnas_0712102105_1.pdf]
